# Supplementary material for: Biogeochemical constraints on the origin of methane in an alluvial aquifer: evidence for the upward migration of methane from a coal seam
Source: Copernicus journal article supplement (doi:10.5194/bg-2016-359), 2016-09-05
Supplement: Supplementary file 1 [file bg-2016-359-supplement.pdf]

## Supplementary Information

### Biogeochemical constraints on the origin of methane in an alluvial aquifer: evidence for the upward migration of methane from a coal seam.

Charlotte P. Iverach, Sabrina, Beckmann, Dioni I. Cendón, Mike Manefield, Bryce F.J. Kelly.

**Supplementary Table S1.** Groundwater geochemical isotopic data used for determining geochemical potential for methanogenesis and *in-situ* oxidation (\* - samples were below the lowest standard).

| Sample | Depth interval (m) | $\delta^{13}\text{C-DIC}$ (‰) | $\delta^{13}\text{C-DOC}$ (‰) | $\delta^{18}\text{O-H}_2\text{O}$ (‰) | $\delta^2\text{H-H}_2\text{O}$ (‰) | $\delta^{34}\text{S-SO}_4$ (‰) | $\delta^{18}\text{O-SO}_4$ (‰) |
|--------|--------------------|-------------------------------|-------------------------------|---------------------------------------|------------------------------------|--------------------------------|--------------------------------|
| A      | 46.6-60.3          | -12                           | -26.9                         | -4.37                                 | -27.8                              | NA                             | NA                             |
| B      | 64.9-69.5          | -10.2                         | -28.2                         | -5.52                                 | -36.2                              | NA                             | NA                             |
| C      | 33.9-41.8          | -9.9                          | -27.6                         | -4.4                                  | -28.7                              | NA                             | NA                             |
| D      | 19.5-35.7          | -9.6                          | -27.2                         | -4.1                                  | -27.1                              | 15.5                           | 10.6                           |
| E      | 23.6-42.5          | -11.2                         | -31.1*                        | -4.25                                 | -28.4                              | NA                             | NA                             |
| F      | 28.6-40.8          | -10.1                         | -30.3                         | -4.88                                 | -32                                | NA                             | NA                             |
| G      | 31.7-35.4          | -9.6                          | -30.2*                        | -4.97                                 | -32.4                              | NA                             | NA                             |
| H      | 25.3-50.3          | -13.6                         | -28.5*                        | -5.08                                 | -32                                | 14.8                           | 9.7                            |

**Supplementary Table S2.** Groundwater major ion data used for determining geochemical potential for methanogenesis and *in-situ* oxidation.

| Sample | Depth interval (m) | [DO] (mg/L) | [SO <sub>4</sub> <sup>2-</sup> ] (mg/L) | [NO <sub>3</sub> <sup>-</sup> ] (mg/L) | [NO <sub>2</sub> <sup>-</sup> ] (mg/L) |
|--------|--------------------|-------------|-----------------------------------------|----------------------------------------|----------------------------------------|
| A      | 46.6-60.3          | 8.53        | 7.3                                     | 1.20                                   | < 0.05                                 |
| B      | 64.9-69.5          | 4.31        | 8                                       | 1.30                                   | < 0.05                                 |
| C      | 33.9-41.8          | 6.5         | 3.2                                     | 2.30                                   | < 0.05                                 |
| D      | 19.5-35.7          | 6.39        | 55                                      | 2.40                                   | < 0.05                                 |
| E      | 23.6-42.5          | 5.02        | 3.3                                     | 1.40                                   | < 0.05                                 |
| F      | 28.6-40.8          | 7.61        | 11                                      | 1.20                                   | < 0.05                                 |
| G      | 31.7-35.4          | 4.85        | 8.2                                     | 1.40                                   | < 0.05                                 |
| H      | 25.3-50.3          | 0.91        | 29                                      | 2.10                                   | < 0.05                                 |

**Supplementary Table S3.** [CH<sub>4</sub>], individual isotopic signature and isotopic source signature data from Iverach et al. (2015) used in discussions on the potential for methanogenesis and *in-situ* oxidation.

| Sample | Depth interval (m) | [CH <sub>4</sub> ] (ppm) | Individual $\delta^{13}\text{C-CH}_4$ (‰) | Source $\delta^{13}\text{C-CH}_4$ (‰) |
|--------|--------------------|--------------------------|-------------------------------------------|---------------------------------------|
| A      | 46.6-60.3          | 1.585                    | -46.4                                     | -55.9                                 |
| B      | 64.9-69.5          | 1.813                    | -47.3                                     | -55.9                                 |
| C      | 33.9-41.8          | 1.813                    | -47.4                                     | -55.9                                 |
| D      | 19.5-35.7          | 1.673                    | -46.9                                     | -55.9                                 |
| E      | 23.6-42.5          | 1.703                    | -45.6                                     | -69.1                                 |
| F      | 28.6-40.8          | 0.889                    | -38.8                                     | -55.9                                 |
| G      | 31.7-35.4          | 1.705                    | -45.6                                     | -69.1                                 |
| H      | 25.3-50.3          | 1.709                    | -45.8                                     | -69.1                                 |
